# Supplementary material for: Analysis of the metabolome of Anopheles gambiae mosquito after exposure to Mycobacterium ulcerans
Source: PubMed Central journal article supplement (PMC4363836; doi:10.1038/srep09242), 2015-03-18
Supplement: srep09242-s1.pdf [file srep09242-s1.pdf]

Analysis of the metabolome of *Anopheles gambiae* mosquito after exposure to *Mycobacterium ulcerans*

J. Charles Hoxmeier<sup>1#</sup>, Brice D. Thompson<sup>1</sup>, Corey D. Broeckling<sup>2</sup>, Pamela Small<sup>3</sup>, Brian D. Foy<sup>1</sup>, Jessica Prenni<sup>2,4</sup>, Karen M. Dobos<sup>1\*</sup>

Supplementary Figures and Table for SREP-14-07711

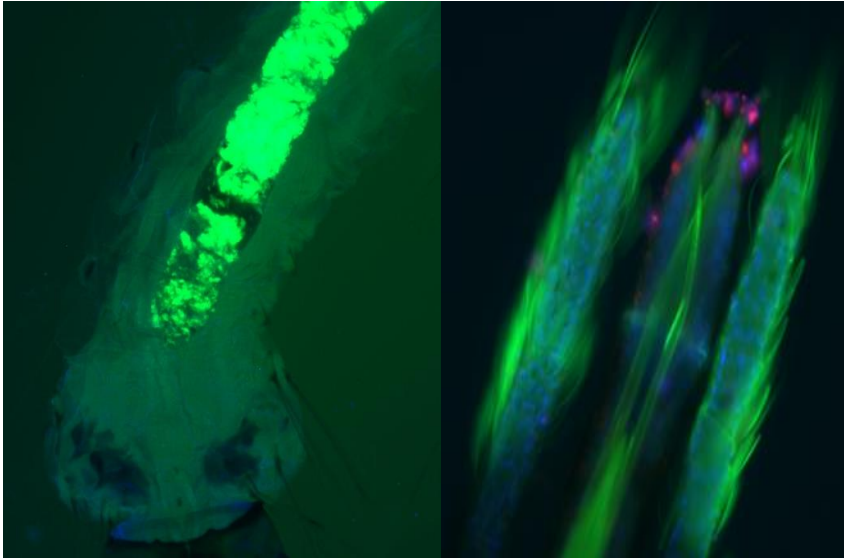

Supplemental Figure S1: Alimentary canal of larval *A. gambiae* mosquito packed with *M. ulcerans* 1615-GFP, viewed under a fluorescent microscope (10x) (Left). Immunofluorescence image of the mosquito proboscis and maxillary palps at 40x magnification. *M. ulcerans* bacilli (labelled in red) contaminated the tip of the labellum (Right).

### Survival Averages Among All Groups

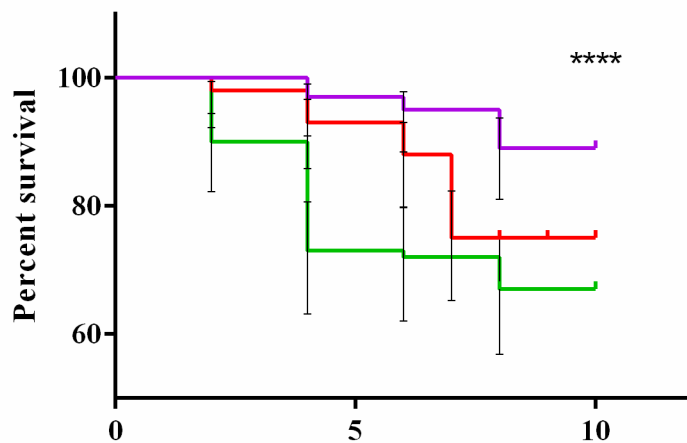

Supplemental Figure S2: Kaplan-Meier plot of Survival to adulthood for *Anopheles gambiae* mosquitoes from all treatment groups. Significant (\*\*\*\*= $P \leq 0.0001$ ) trend for survival among all groups and significant difference (\*\*\*\*= $P \leq 0.0001$ ) in final survival between mosquitoes exposed to live compared to dead *M. ulcerans*. Mosquitoes exposed to dead,  $\gamma$ -irradiated *M. ulcerans* (top), control mosquitoes (middle), mosquitoes exposed to live *M. ulcerans* (bottom).

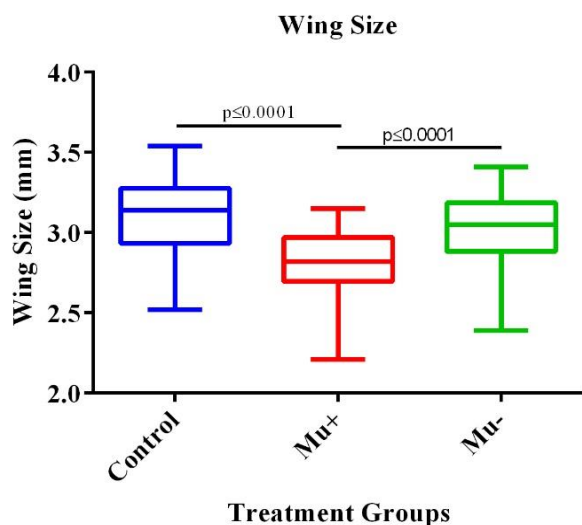

Supplemental Figure S3: Comparison of the wing size of emerged female mosquitoes as a proxy for body size. Adult mosquitoes are significantly smaller than their control counterparts as a result of exposure to live *M.*

Supplementary Table S1

| ID <sup>a</sup> | Compound Annotation <sup>b</sup>            | KEGG ID <sup>c</sup> | Retention time <sup>d</sup> | m/z <sup>e</sup> | <i>P</i> -value <sup>f</sup><br>Mu+ vs Ctrl | <i>P</i> -value <sup>f</sup><br>Mu- vs Ctrl | ID confidence <sup>g</sup> | Fold Change<br>Control vs Mu+ <sup>h</sup> | Fold Change<br>Control vs Mu- <sup>i</sup> |
|-----------------|---------------------------------------------|----------------------|-----------------------------|------------------|---------------------------------------------|---------------------------------------------|----------------------------|--------------------------------------------|--------------------------------------------|
| <b>C186</b>     | 1-hexadecanoyl-sn-glycero-3-PC              | C04317               | 522.7                       | 518.325          | 0.036                                       | 0.012                                       | II                         | 1.660                                      | 0.740                                      |
| <b>C449</b>     | ACTH-like                                   | C02017               | 508.4                       | 468.309          | 0.009                                       | 0.051                                       | II                         | 1.356                                      | 1.410                                      |
| <b>C794</b>     | locustachykinin II                          | C16098               | 589.5                       | 1065.693         | 0.417                                       | 0.008                                       | II                         | 1.121                                      | 1.712                                      |
| <b>C104</b>     | GPCHo<br>(17:1(9Z)/22:5(4Z,7Z,10Z,13Z,16Z)) | C05212               | 520.3                       | 494.324          | 0.086                                       | 0.007                                       | II                         | 1.100                                      | 1.400                                      |
| <b>C100</b>     | GPCho (17:1(9Z)/22:5(4Z,7Z,10Z,16Z))        | C05212               | 586.2                       | 508.340          | 0.066                                       | 0.003                                       | II                         | 0.600                                      | 0.170                                      |
| <b>C641</b>     | Dodecylbenzenesulfonic acid                 | n/a                  | 849.2                       | 703.217          | <0.001                                      | 0.001                                       | II                         | 0.524                                      | 0.482                                      |
| <b>C814</b>     | GPEtn 42:3                                  | C04475               | 858.6                       | 804.557          | 0.044                                       | 0.042                                       | III                        | 2.753                                      | 0.483                                      |
| <b>C355</b>     | GPEtn (20:0/20:0)                           | C04475               | 737.7                       | 782.579          | 0.008                                       | 0.755                                       | III                        | 2.438                                      | 1.067                                      |
| <b>C426</b>     | Lyso-PC 24:0                                | C04317               | 575.7                       | 570.355          | 0.004                                       | 0.562                                       | III                        | 2.215                                      | 1.114                                      |
| <b>C686</b>     | GPEtn 42:3                                  | C04475               | 720.4                       | 804.579          | <0.001                                      | 0.691                                       | III                        | 2.002                                      | 1.070                                      |
| <b>C456</b>     | peptide fragment                            | n/a                  | 556.4                       | 546.284          | 0.005                                       | 0.259                                       | III                        | 1.874                                      | 0.807                                      |
| <b>C465</b>     | oxytocin-like                               | C00746               | 550.0                       | 955.584          | 0.012                                       | 0.921                                       | III                        | 1.851                                      | 0.970                                      |
| <b>C24</b>      | Dodecylbenzenesulfonic acid                 | n/a                  | 752.6                       | 554.177          | 0.007                                       | 0.710                                       | III                        | 1.830                                      | 1.050                                      |
| <b>C493</b>     | Sphingomyelin 40:5                          | C00550               | 825.5                       | 786.509          | 0.027                                       | 0.304                                       | III                        | 1.759                                      | 0.806                                      |
| <b>C555</b>     | dynorphin-like                              | C01574               | 646.2                       | 508.341          | 0.006                                       | 0.049                                       | III                        | 1.592                                      | 1.306                                      |
| <b>C326</b>     | GPEtn(7:0/20:4(5E,8E,11E,14E))              | C04475               | 513.6                       | 472.364          | 0.016                                       | 0.042                                       | III                        | 1.550                                      | 1.415                                      |
| <b>C52</b>      | Lyso-PC 16:0                                | C05209               | 520.0                       | 476.279          | 0.034                                       | 0.068                                       | III                        | 1.523                                      | 0.850                                      |
| <b>C217</b>     | Sphingomyelin (d19:1(4E)/26:1(17Z))         | C00550               | 948.0                       | 85.086           | 0.019                                       | 0.201                                       | III                        | 1.420                                      | 1.220                                      |
| <b>C240</b>     | Lyso-PC 18:0                                | C04317               | 618.5                       | 524.372          | 0.034                                       | 0.844                                       | III                        | 1.400                                      | 0.978                                      |

|             |                                 |        |       |          |       |        |     |       |       |
|-------------|---------------------------------|--------|-------|----------|-------|--------|-----|-------|-------|
| <b>C71</b>  | GPSer (15:0/25:0)               | C18125 | 768.1 | 761.609  | 0.004 | 0.320  | III | 1.380 | 0.920 |
| <b>C183</b> | Lyso-PE 18:1                    | C05209 | 586.4 | 959.613  | 0.021 | 0.016  | III | 1.350 | 1.570 |
| <b>C575</b> | ACTH-like                       | C02017 | 587.9 | 587.940  | 0.255 | 0.037  | III | 1.309 | 1.780 |
| <b>C243</b> | 2-oleoyl glycerol               | n/a    | 595.1 | 542.299  | 0.020 | 0.308  | III | 1.300 | 1.080 |
| <b>C344</b> | ACTH-like                       | C02017 | 500.0 | 468.308  | 0.012 | 0.017  | III | 1.290 | 1.285 |
| <b>C83</b>  | GPEtn (5:0/24:4(5Z,8Z,11Z,14Z)) | C04475 | 558.3 | 500.395  | 0.027 | 0.881  | III | 1.234 | 0.986 |
| <b>C335</b> | GPEtn(9:0/18:3(6Z,9Z,12Z))      | C04475 | 545.1 | 474.379  | 0.034 | 0.158  | III | 1.230 | 0.856 |
| <b>C245</b> | peptide fragment                | n/a    | 528.1 | 452.277  | 0.056 | <0.001 | III | 1.220 | 1.930 |
| <b>C444</b> | Lyso-PE 29:5                    | C05209 | 530.0 | 498.379  | 0.130 | 0.018  | III | 1.212 | 0.692 |
| <b>C562</b> | Lyso-PE 20:4                    | C05209 | 574.1 | 361.274  | 0.230 | 0.010  | III | 1.202 | 0.395 |
| <b>C560</b> | angiotensin-like                | C15850 | 578.8 | 1031.713 | 0.018 | 0.011  | III | 1.197 | 1.376 |
| <b>C107</b> | neurotensin-like                | n/a    | 552.3 | 502.294  | 0.042 | 0.148  | III | 1.150 | 0.890 |
| <b>C194</b> | Lyso-PE                         | C05209 | 543.5 | 502.294  | 0.05  | 0.05   | III | 1.140 | 0.840 |
| <b>C123</b> | Lyso-PE 16:1                    | C05209 | 536.0 | 311.259  | 0.375 | 0.001  | III | 1.090 | 1.800 |
| <b>C315</b> | isoprene                        | n/a    | 575.6 | 975.633  | 0.133 | 0.014  | III | 1.070 | 1.165 |
| <b>C590</b> | Lyso-PC 20:1                    | C04317 | 520.3 | 266.639  | 0.397 | 0.008  | III | 1.060 | 1.360 |
| <b>C790</b> | GPEtn 28:6                      | C04475 | 574.1 | 621.303  | 0.485 | 0.008  | III | 1.057 | 0.512 |
| <b>C712</b> | adrenosterone-like              | C05285 | 546.2 | 582.300  | 0.784 | 0.011  | III | 1.016 | 0.749 |
| <b>C22</b>  | Lyso-PE 16:1                    | C05209 | 517.6 | 474.260  | 0.590 | 0.005  | III | 0.980 | 1.610 |
| <b>C120</b> | 1-octadecanoyl-sn-glycero-3-PE  | C04475 | 623.8 | 482.324  | 0.498 | 0.017  | III | 0.964 | 0.856 |
| <b>C223</b> | Lyso-PE 21:0                    | C05209 | 264.2 | 520.338  | 0.001 | 0.097  | III | 0.951 | 1.122 |
| <b>C205</b> | Oleic acid-like                 | C00712 | 749.0 | 283.264  | 0.479 | 0.044  | III | 0.943 | 0.851 |
| <b>C203</b> | GPEtn(17:1(9Z)/17:1(9Z))        | C04475 | 749.1 | 689.561  | 0.603 | 0.022  | III | 0.922 | 0.589 |

|             |                                                    |        |       |         |       |        |     |       |       |
|-------------|----------------------------------------------------|--------|-------|---------|-------|--------|-----|-------|-------|
| <b>C95</b>  | 1-octadecanoyl-sn-glycero-3-PE                     | C04475 | 716.0 | 357.300 | 0.558 | 0.031  | III | 0.921 | 0.642 |
| <b>C234</b> | unknown                                            | C11045 | 708.9 | 281.248 | 0.001 | 0.007  | III | 0.880 | 0.830 |
| <b>C180</b> | prostaglandin-like                                 | C00639 | 697.3 | 329.248 | 0.009 | <0.001 | III | 0.870 | 0.670 |
| <b>C408</b> | GPEtn (20:0/18:2)                                  | C04475 | 670.1 | 379.283 | 0.352 | 0.001  | III | 0.867 | 0.586 |
| <b>C688</b> | pimelic acid-like                                  | C02656 | 708.8 | 245.227 | 0.001 | 0.023  | III | 0.850 | 0.781 |
| <b>C125</b> | Lyso-PC 20:5                                       | C04317 | 516.8 | 564.306 | 0.103 | 0.002  | III | 0.840 | 0.620 |
| <b>C414</b> | 4-(2-Hydroxyethyl)piperazine-1-ethanesulfonic acid | n/a    | 708.6 | 239.202 | 0.036 | 0.047  | III | 0.829 | 0.809 |
| <b>C416</b> | GPEtn(15:0/18:2(2E,4E))                            | C04475 | 708.7 | 264.241 | 0.094 | 0.006  | III | 0.820 | 0.799 |
| <b>C415</b> | 3-cyclohexyl-1-propanol                            | n/a    | 708.8 | 83.086  | 0.019 | 0.011  | III | 0.818 | 0.809 |
| <b>C93</b>  | Androstane-like                                    | C03772 | 669.9 | 267.212 | 0.004 | 0.056  | III | 0.806 | 0.836 |
| <b>C322</b> | peptide fragment                                   | n/a    | 534.3 | 641.271 | 0.035 | 0.240  | III | 0.796 | 0.907 |
| <b>C38</b>  | histamine-like                                     | C00388 | 990.5 | 130.159 | 0.035 | 0.042  | III | 0.730 | 0.694 |
| <b>C102</b> | Lyso-PE 16:0                                       | C05209 | 528.0 | 245.616 | 0.732 | 0.027  | III | 0.730 | 1.600 |
| <b>C151</b> | Lyso-PC 20:0                                       | C04317 | 646.5 | 468.345 | 0.004 | 0.240  | III | 0.710 | 0.790 |
| <b>C336</b> | Lyso-PE 17:1                                       | C05209 | 549.6 | 506.323 | 0.040 | 0.004  | III | 0.680 | 0.391 |
| <b>C421</b> | GPCCho (14:0/17:1(9Z))                             | C05212 | 598.9 | 508.339 | 0.069 | <0.001 | III | 0.654 | 0.213 |
| <b>C589</b> | unknown                                            | n/a    | 521.3 | 440.277 | 0.003 | <0.001 | IV  | 4.150 | 2.810 |
| <b>C341</b> | unknown                                            | n/a    | 484.9 | 199.133 | 0.002 | <0.001 | IV  | 3.450 | 2.390 |
| <b>C828</b> | unknown                                            | n/a    | 781.3 | 297.279 | 0.051 | 0.012  | IV  | 3.392 | 0.536 |
| <b>C753</b> | unknown                                            | n/a    | 792.7 | 738.627 | 0.003 | 0.412  | IV  | 2.346 | 1.181 |
| <b>C321</b> | unknown                                            | n/a    | 583.6 | 510.356 | 0.009 | 0.032  | IV  | 2.320 | 1.590 |
| <b>C209</b> | unknown                                            | n/a    | 807.7 | 826.541 | 0.016 | 0.231  | IV  | 2.260 | 0.755 |
| <b>C506</b> | unknown                                            | n/a    | 792.0 | 800.528 | 0.045 | 0.033  | IV  | 2.199 | 0.765 |

|             |         |        |       |          |        |        |    |       |       |
|-------------|---------|--------|-------|----------|--------|--------|----|-------|-------|
| <b>C591</b> | unknown | n/a    | 560.4 | 307.227  | 0.001  | 0.003  | IV | 2.110 | 1.800 |
| <b>C78</b>  | unknown | n/a    | 650.0 | 309.243  | 0.006  | 0.346  | IV | 1.917 | 0.851 |
| <b>C643</b> | unknown | n/a    | 772.2 | 760.593  | 0.031  | 0.946  | IV | 1.860 | 0.985 |
| <b>C795</b> | unknown | n/a    | 589.5 | 1001.670 | 0.119  | 0.008  | IV | 1.688 | 2.027 |
| <b>C482</b> | unknown | n/a    | 734.1 | 331.263  | 0.005  | 0.982  | IV | 1.661 | 1.006 |
| <b>C443</b> | unknown | n/a    | 530.8 | 522.379  | 0.002  | 0.042  | IV | 1.600 | 0.750 |
| <b>C187</b> | unknown | n/a    | 517.5 | 452.277  | 0.298  | <0.001 | IV | 1.570 | 1.050 |
| <b>C338</b> | unknown | n/a    | 549.4 | 509.345  | 0.007  | 0.021  | IV | 1.560 | 1.490 |
| <b>C703</b> | unknown | n/a    | 522.9 | 544.268  | 0.009  | 0.944  | IV | 1.560 | 1.011 |
| <b>C750</b> | unknown | n/a    | 763.6 | 684.581  | <0.001 | 0.053  | IV | 1.449 | 1.311 |
| <b>C379</b> | unknown | n/a    | 774.7 | 712.611  | 0.020  | 0.405  | IV | 1.394 | 0.850 |
| <b>C442</b> | unknown | n/a    | 536.3 | 544.341  | 0.001  | 0.614  | IV | 1.353 | 0.921 |
| <b>C390</b> | unknown | n/a    | 916.8 | 804.556  | 0.015  | 0.480  | IV | 1.326 | 0.922 |
| <b>C461</b> | unknown | n/a    | 540.6 | 498.379  | 0.038  | 0.142  | IV | 1.259 | 0.837 |
| <b>C799</b> | unknown | C07443 | 528.1 | 253.100  | 0.186  | 0.002  | IV | 1.217 | 1.958 |
| <b>C195</b> | unknown | n/a    | 548.1 | 466.293  | 0.076  | 0.018  | IV | 1.200 | 2.160 |
| <b>C328</b> | unknown | n/a    | 520.2 | 516.306  | 0.149  | 0.003  | IV | 1.180 | 1.600 |
| <b>C705</b> | unknown | n/a    | 520.3 | 517.311  | 0.545  | 0.018  | IV | 1.087 | 1.410 |
| <b>C807</b> | unknown | n/a    | 520.2 | 1014.612 | 0.336  | 0.009  | IV | 1.069 | 1.773 |
| <b>C711</b> | unknown | n/a    | 546.1 | 299.132  | 0.400  | 0.045  | IV | 1.065 | 0.799 |
| <b>C422</b> | unknown | n/a    | 633.1 | 283.263  | 0.989  | <0.001 | IV | 0.999 | 2.127 |
| <b>C550</b> | unknown | n/a    | 708.6 | 179.143  | 0.471  | 0.028  | IV | 0.971 | 0.819 |
| <b>C818</b> | unknown | n/a    | 728.8 | 308.265  | 0.651  | 0.011  | IV | 0.952 | 0.692 |

|             |         |     |       |         |        |       |    |       |       |
|-------------|---------|-----|-------|---------|--------|-------|----|-------|-------|
| <b>C709</b> | unknown | n/a | 539.7 | 743.395 | 0.283  | 0.026 | IV | 0.923 | 0.770 |
| <b>C577</b> | unknown | n/a | 536.3 | 571.290 | 0.225  | 0.033 | IV | 0.910 | 1.529 |
| <b>C118</b> | unknown | n/a | 704.2 | 235.169 | 0.367  | 0.017 | IV | 0.900 | 0.600 |
| <b>C447</b> | unknown | n/a | 525.6 | 299.628 | 0.086  | 0.011 | IV | 0.885 | 0.744 |
| <b>C583</b> | unknown | n/a | 516.7 | 298.626 | 0.189  | 0.010 | IV | 0.850 | 0.539 |
| <b>C178</b> | unknown | n/a | 669.9 | 171.122 | 0.024  | 0.047 | IV | 0.828 | 0.753 |
| <b>C568</b> | unknown | n/a | 568.3 | 318.131 | 0.118  | 0.014 | IV | 0.825 | 0.730 |
| <b>C430</b> | unknown | n/a | 568.6 | 279.232 | 0.017  | 0.035 | IV | 0.798 | 0.846 |
| <b>C663</b> | unknown | n/a | 946.6 | 304.299 | 0.017  | 0.356 | IV | 0.797 | 1.120 |
| <b>C366</b> | unknown | n/a | 825.0 | 529.881 | <0.001 | 0.476 | IV | 0.783 | 0.958 |
| <b>C704</b> | unknown | n/a | 523.3 | 270.120 | 0.006  | 0.006 | IV | 0.760 | 0.851 |
| <b>C227</b> | unknown | n/a | 360.3 | 98.512  | 0.046  | 0.003 | IV | 0.743 | 0.770 |
| <b>C548</b> | unknown | n/a | 708.5 | 139.112 | 0.001  | 0.010 | IV | 0.727 | 0.663 |
| <b>C177</b> | unknown | n/a | 356.4 | 98.512  | 0.035  | 0.111 | IV | 0.710 | 0.790 |
| <b>C593</b> | unknown | n/a | 554.9 | 530.320 | 0.103  | 0.007 | IV | 0.670 | 0.279 |
| <b>C578</b> | unknown | n/a | 534.3 | 424.324 | 0.044  | 0.015 | IV | 0.488 | 0.275 |
| <b>C528</b> | unknown | n/a | 24.6  | 173.021 | <0.001 | 0.228 | IV | 0.463 | 0.784 |
| <b>C699</b> | unknown | n/a | 517.6 | 398.327 | 0.033  | 0.047 | IV | 0.454 | 0.485 |

Supplementary Table S1 key a) Compound identifier. b) identification of compound based on match of mass spectra, m/z ratio, and/or retention time to available databases. c) compound identifier from Kyoto Encyclopedia of Genes and Genomes ([www.genome.jp/kegg/](http://www.genome.jp/kegg/)) d) retention time (seconds) generated via liquid chromatography. e) mass to charge ratio of the base peak from the mass spectra. f) T-test p-value of pairwise comparison between specified treatment and control group. g) confidence level of identification based on matching of chromatographic and mass spectral characteristics for each compound to validated compound library or publicly available databases, from Sumner et al. 2007. *Metabolomics*. h/i) fold change in abundance of compound compared between control and treatment groups. Abbreviations: PC: phosphocholine; GPCCho: glycerophosphocholine; GPEtn: glycerophosphoethanolamine; GPSer: glycerophosphoserine; ACTH: adrenocorticotrophic hormone; X:N represents number of carbons to double bonds in a given compound.
